# Supplementary material
Source: PubMed Central journal article supplement (PMC7100017)

## Supplementary data

### **PGC-1 $\alpha$ plays a pivotal role in simvastatin-induced exercise impairment in mice**

Miljenko Valentin Panajatovic<sup>1,2</sup>, François Singh<sup>1,2</sup>, Noëmi Johanna Roos<sup>1,2</sup>, Urs Duthaler<sup>1,2</sup>,  
Christoph Handschin<sup>3</sup>, Stephan Krähenbühl<sup>1,2,4</sup>, and Jamal Bouitbir\*<sup>1,2,4</sup>

**Running title:** PGC-1 $\alpha$  and statin-induced myotoxicity

<sup>1</sup> Division of Clinical Pharmacology & Toxicology, University Hospital, Basel, Switzerland

<sup>2</sup> Department of Biomedicine, University of Basel, Switzerland

<sup>3</sup> Biocenter, University of Basel, Basel, Switzerland

<sup>4</sup> Swiss Centre for Applied Human Toxicology (SCAHT), Basel, Switzerland

**\*Corresponding author:**

Jamal Bouitbir, PhD

Clinical Pharmacology & Toxicology

University Hospital

4031 Basel, Switzerland

Phone: +41 61 265 2395

Fax: +41 61 265 5401

e-mail: [jamal.bouitbir@unibas.ch](mailto:jamal.bouitbir@unibas.ch)

**Suppl. Figure 1. Skeletal muscle mRNA expression of lactate carriers.** Expression of mRNA was determined by real time PCR as described in Methods. Physical capacity was determined as running distance and vertical power using a treadmill. Results were normalized to *18s* expression and were determined in white gastrocnemius for **(A)** *Mct1* and **(B)** *Mct2*. Data are presented as mean  $\pm$  SEM of 10 animals per group. \* $p < 0.05$  between simvastatin-treated and respective control mice. # $p < 0.05$  between control groups of KO or OE mice and WT mice. Abbreviations: WT, wild type; KO, PGC-1 $\alpha$  knock-out mice; OE, PGC-1 $\alpha$  overexpressing mice; Ctl: control; Simv, simvastatin; MCT, monocarboxylate transporter.

**Suppl. Figure 2. Number of electrical shocks during the treadmill exercise test.**

Physical capacity was determined as running distance and vertical power using a treadmill. Mice received non-harmful electrical shocks from a grid at the basis of the treadmill to motivate them to run. Total number of shocks received for individual mice are shown for **(A)** WT mice, **(B)** KO mice and **(C)** OE mice. The average time to reach 40 shocks is shown in **(D)**. Data are presented as individual curves **(A – C)** or mean  $\pm$  SEM of 10 animals per group. \* $p < 0.05$  between simvastatin-treated and respective control mice. # $p < 0.05$  between control groups of KO or OE mice and WT mice. Abbreviations: WT, wild type; KO, PGC-1 $\alpha$  knock-out mice; OE, PGC-1 $\alpha$  overexpressing mice; Ctl: control; Simv, simvastatin.

**Suppl. Figure 3. Respiratory control ratio (RER) during the treadmill exercise.**

Physical capacity was determined as running distance and vertical power using a treadmill. Consumption of oxygen ( $VO_2$ ) and production of  $CO_2$  ( $VCO_2$ ) was determined during the entire exercise time, allowing us to calculate the RER as  $VCO_2/VO_2$ . **(A)** Oxygen consumption ( $VO_2$ ), **(B)**  $CO_2$  production ( $VCO_2$ ) and **(C)** RER ( $VCO_2/VO_2$ ). The average time to reach 40 shocks is shown in **(D)**. Data are presented as individual curves **(A – C)** or mean  $\pm$  SEM of 10 animals per group. \* $p < 0.05$  between simvastatin-treated and respective control mice. # $p < 0.05$  between control groups of KO or OE mice and WT mice. Abbreviations: WT,

wild type; KO, PGC-1 $\alpha$  knock-out mice; OE, PGC-1 $\alpha$  overexpressing mice; Ctl: control; Simv, simvastatin.

**Suppl. Figure 4. Number of mitochondria in white and red quadriceps muscle per area.**

The number of mitochondria was determined morphometrically in muscle sections analyzed by electron microscopy in 64  $\mu\text{m}^2$ . Number of mitochondria per 64  $\mu\text{m}^2$  in white quadriceps **(A)** and in red quadriceps **(B)**. Data are presented as mean  $\pm$  SEM of 6 separate micrographs per group. \*p <0.05 between simvastatin-treated and respective control mice. #p <0.05 between control groups of KO or OE mice and WT mice. Abbreviations: WT, wild type; KO, PGC-1 $\alpha$  knock-out mice; OE, PGC-1 $\alpha$  overexpressing mice; Ctl: control; Simv, simvastatin.

Suppl. Table 1 - Treadmill data of control (Ctl) and simvastatin-treated (Simv) mice.

| Mouse model                          | WT        |           | KO                     |           | OE                     |           |
|--------------------------------------|-----------|-----------|------------------------|-----------|------------------------|-----------|
|                                      | Treatment | Ctl       | Simv                   | Ctl       | Simv                   | Ctl       |
| <b>Shock number until exhaustion</b> |           |           |                        |           |                        |           |
| <b>Shocks number</b>                 | 205±26    | 198±28    | 80±11                  | 82±13     | 251±23                 | 285±35    |
| <b>RER</b>                           |           |           |                        |           |                        |           |
| <b>Speed (cm x s<sup>-1</sup>)</b>   |           |           |                        |           |                        |           |
| 17                                   | 0.89±0.03 | 0.93±0.03 | 0.97±0.01 <sup>#</sup> | 0.93±0.02 | 0.85±0.02              | 0.87±0.02 |
| 20                                   | 0.89±0.03 | 0.90±0.02 | 0.97±0.01              | 0.93±0.02 | 0.84±0.02              | 0.87±0.02 |
| 23                                   | 0.90±0.04 | 0.90±0.03 | 0.97±0.01              | 0.94±0.02 | 0.85±0.02              | 0.86±0.02 |
| 26                                   | 0.92±0.06 | 0.93±0.04 | 1.01±0.02              | 0.96±0.02 | 0.85±0.02              | 0.88±0.02 |
| 29                                   | 0.91±0.04 | 0.94±0.04 | 1.03±0.02 <sup>#</sup> | 1.00±0.02 | 0.86±0.03              | 0.88±0.02 |
| 32                                   | 0.94±0.06 | 0.94±0.03 | 1.04±0.02              | 1.02±0.03 | 0.85±0.02              | 0.90±0.02 |
| 35                                   | 0.94±0.05 | 0.94±0.03 | 1.05±0.03              | 1.04±0.03 | 0.88±0.03              | 0.90±0.02 |
| 38                                   | 0.95±0.04 | 0.96±0.03 | 1.10±0.04 <sup>#</sup> | 1.03±0.01 | 0.87±0.02              | 0.90±0.02 |
| 41                                   | 1.00±0.06 | 0.96±0.03 |                        |           | 0.87±0.03 <sup>#</sup> | 0.90±0.02 |
| 44                                   | 1.04±0.08 | 0.96±0.02 |                        |           | 0.87±0.03 <sup>#</sup> | 0.91±0.01 |
| 47                                   | 1.01±0.06 | 0.96±0.02 |                        |           | 0.87±0.02 <sup>#</sup> | 0.91±0.02 |
| 50                                   | 1.07±0.04 | 0.99±0.02 |                        |           | 0.87±0.02 <sup>#</sup> | 0.92±0.02 |
| 53                                   |           |           |                        |           | 0.88±0.02              | 0.92±0.02 |
| 56                                   |           |           |                        |           | 0.88±0.02              | 0.93±0.02 |

WT, wild-type mice; KO, muscle PGC-1 $\alpha$  knockout mice; OE, muscle PGC-1 $\alpha$  overexpression mice. All values are expressed as mean±SEM with n=10 per group. <sup>#</sup>p<0.05 between the control groups of KO or OE mice and WT mice for the same speed.

**Suppl. Table 2: Primer list for quantitative real-time PCR amplification**

| <b>Gene</b> | <b>Species</b> | <b>Forward primer</b>           | <b>Reverse primer</b>              |
|-------------|----------------|---------------------------------|------------------------------------|
| <i>Cox2</i> | Mouse          | GTT GAT AAC CGA GTC GTT CTG C   | CCT GGG ATG GCA TCA GTT TT         |
| <i>Hk2</i>  | Mouse          | GCC AGC CTC TCC TGA TTT TAG TGT | GGG AAC ACA AAA GAC CTC TTC<br>TGG |
| <i>Sod1</i> | Mouse          | GGC AAA GGT GGA AAT GAA GA      | GTT TAC TGC GCA ATC CCA AT         |
| <i>Sod2</i> | Mouse          | TCA ATG GTG GGG GAC ATA TT      | GCT TGA TAG CCT CCA GCA AC         |
| <i>Mct1</i> | Mouse          | TGC AAC GAC CAG TGA AGT ATC A   | ACA ACC ACC AGC GAT CAT TAC T      |
| <i>Mct4</i> | Mouse          | AGA GCA CTT AAA GTC GCC CCC     | GGG CTG CTT TCA CCT GTT ACC        |
| <i>18s</i>  | Mouse          | AGT CCC TGC CCT TTG TAC ACA     | CGA TCC GAG GGC CTC ACT A          |

*Cox2*, cytochrome oxidase 2; *Hk2*, hexokinase 2; *Sod1*, superoxide dismutase 1; *Sod2*, superoxide dismutase 2; *Mct1*, monocarboxylate transporter 1; *Mct4*, monocarboxylate transporter 4; *18s*, 18s ribosome RNA.

Suppl. Figure 1

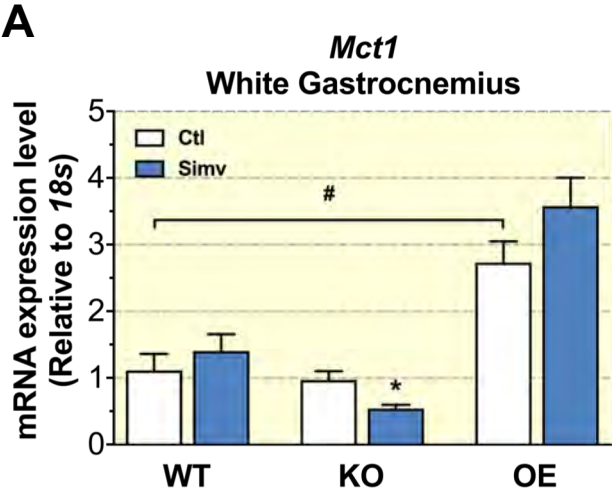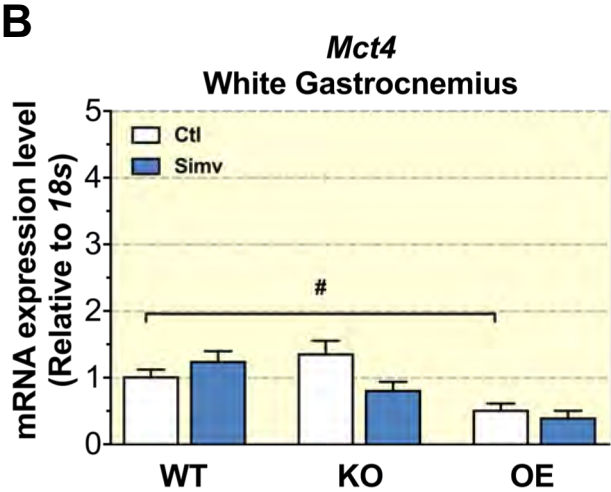

# Suppl. Figure 2

## A

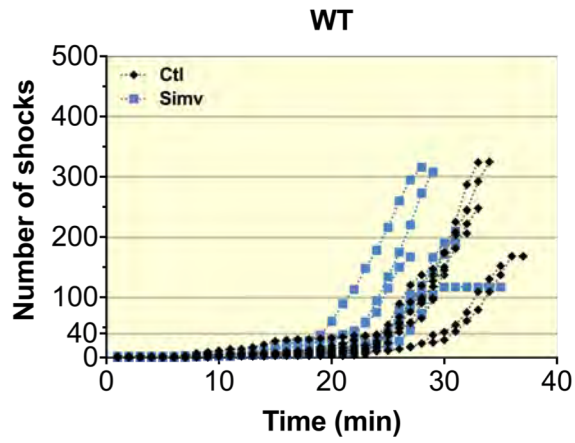

## B

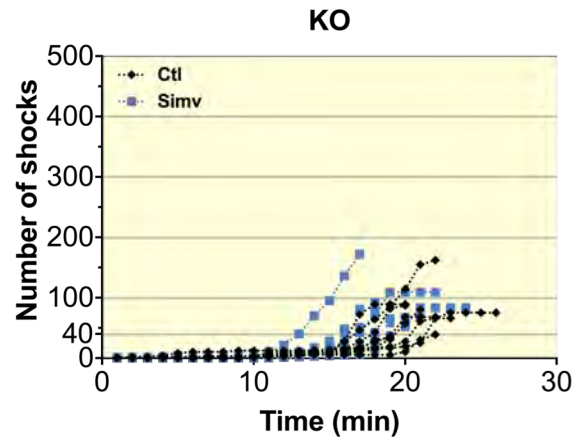

## C

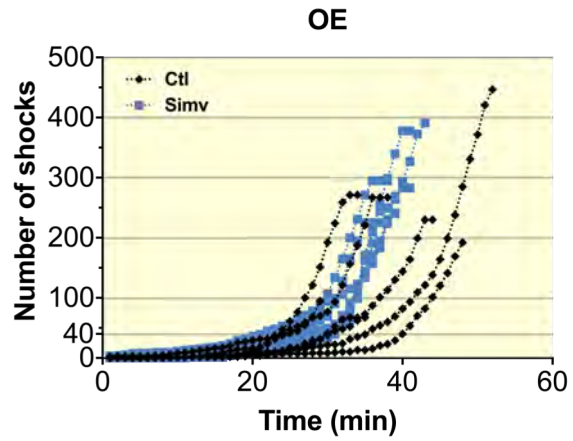

## D

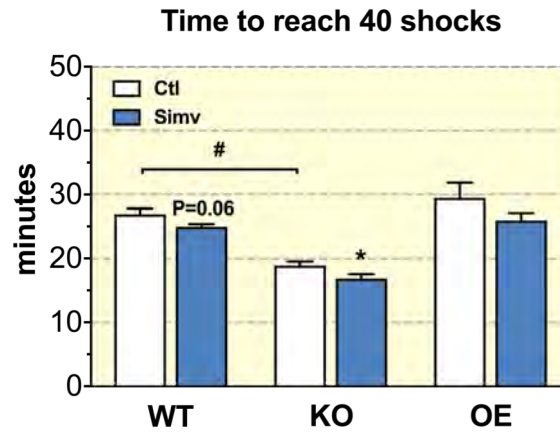

# Suppl. Figure 3

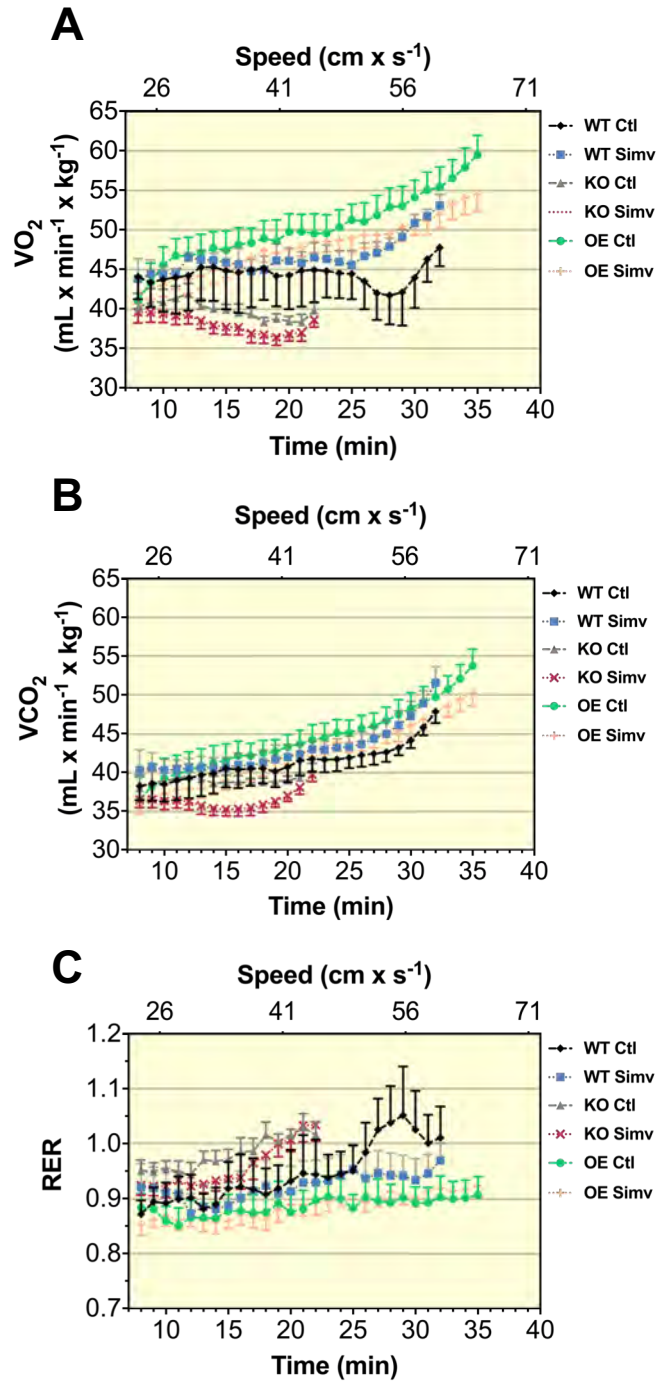



Suppl. Figure 4

**A**

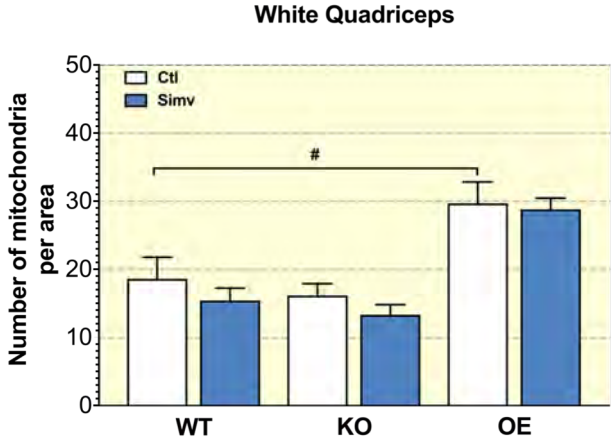

**B**

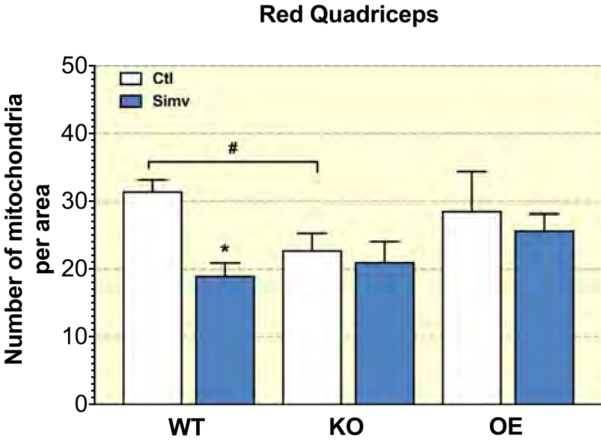

Supplement: EMS85972-supplement-Supplementary_data.pdf [file EMS85972-supplement-Supplementary_data.pdf]
